# Supplementary material for: Discontinuation of anti-VEGF cancer therapy promotes metastasis through a liver revascularization mechanism
Source: PubMed Central journal article supplement (PMC5025794; doi:10.1038/ncomms12680), 2016-09-01
Supplement: ncomms12680-s1.pdf [file ncomms12680-s1.pdf]

## **Supplementary Figure and Figure Legends**

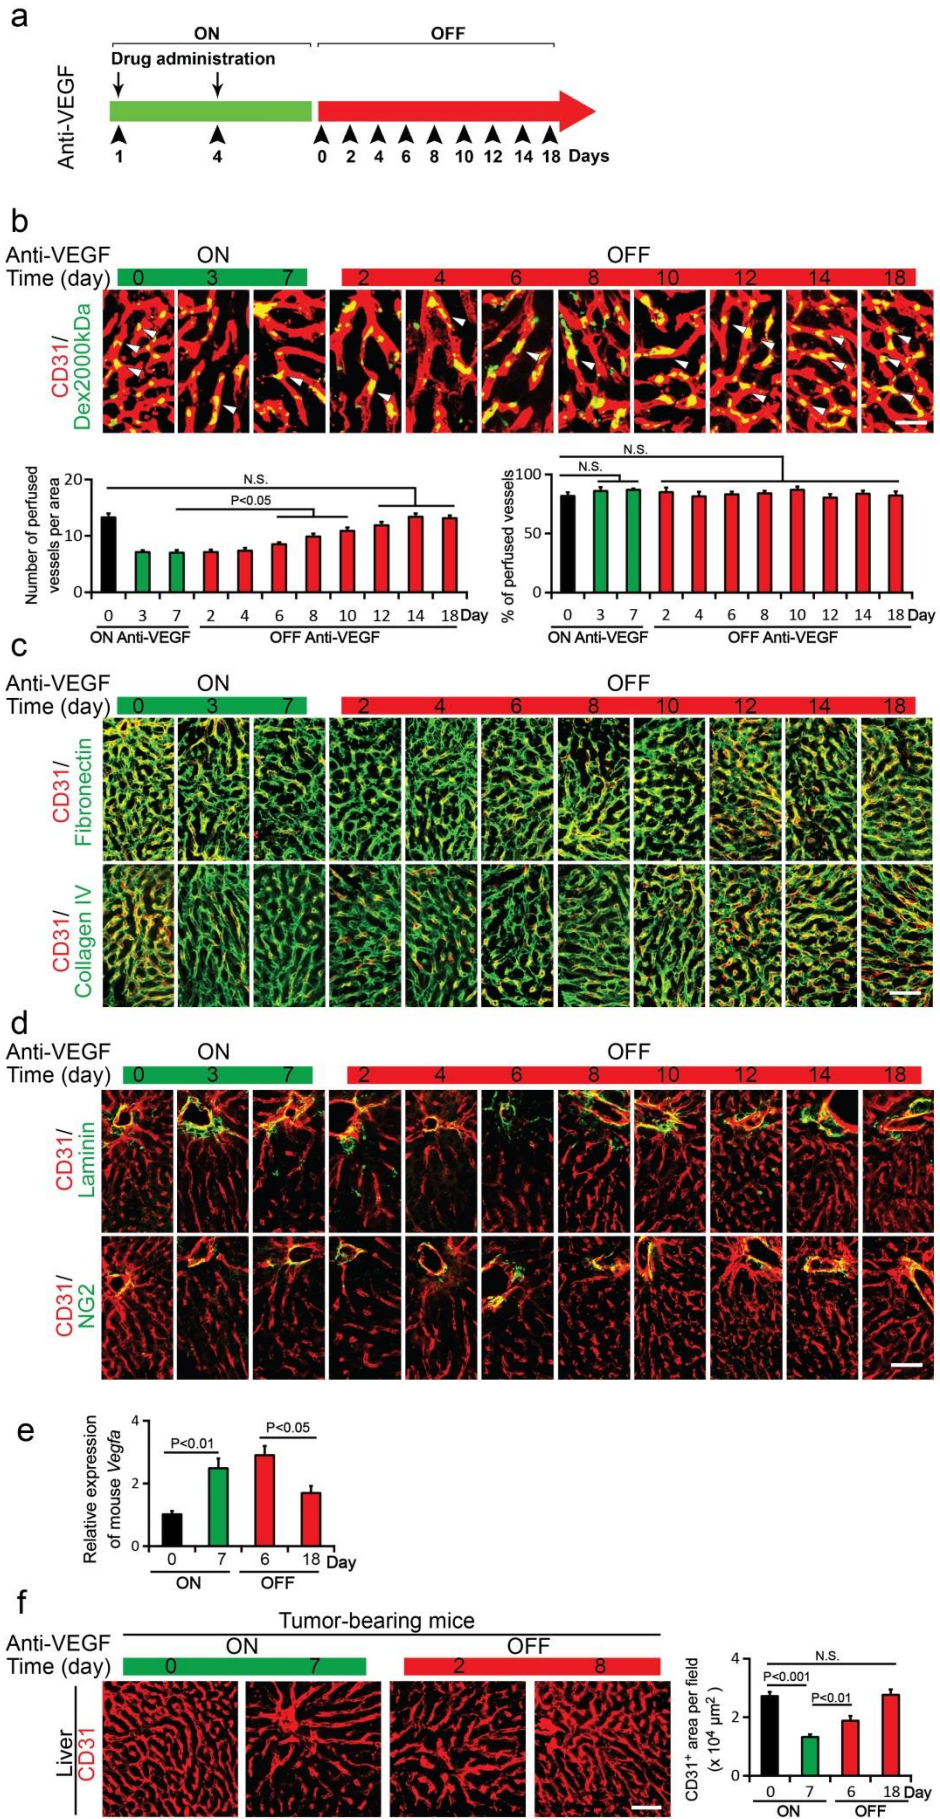

**Supplementary Figure 1: Vascular perfusion and expression of extracellular matrix proteins**

(a) Schematic diagram of anti-VEGF treatment of withdrawal of drugs. Healthy mice were administrated with anti-VEGF antibody at day 1 and day 4. Liver tissues were examined at day 0, on-drug day 3 and day 7, and off-drug day 2, 4, 6, 8, 12, 14, 18. (b) Vascular perfusion of Fluorescein-labeled 2000-kDa-dextran in liver microvasculatures of various groups. Arrows point to dextran signals. Scale bar, 25  $\mu\text{m}$ . Data were quantified from 9 random fields per group. (c) Immunohistochemical analysis of expression levels of fibronectin and collagen IV in various groups. Scale bar, 50  $\mu\text{m}$ . (d) Immunohistochemical analysis of expression levels of laminin and NG2 in various groups. Scale bar, 50  $\mu\text{m}$ . (e) Quantification of *Vegf* mRNA levels by qPCR (n = 3 samples per group). (f) CD31<sup>+</sup> liver microvessels in tumor-bearing mice received On and Off anti-VEGF treatment. Scale bar, 50  $\mu\text{m}$ . Quantification of CD31<sup>+</sup> areas (n = 8 fields per group). ON = on-drug; OFF = off-drug. (mean  $\pm$  s.e.m., N.S., Not significant, Student's *t*-test)

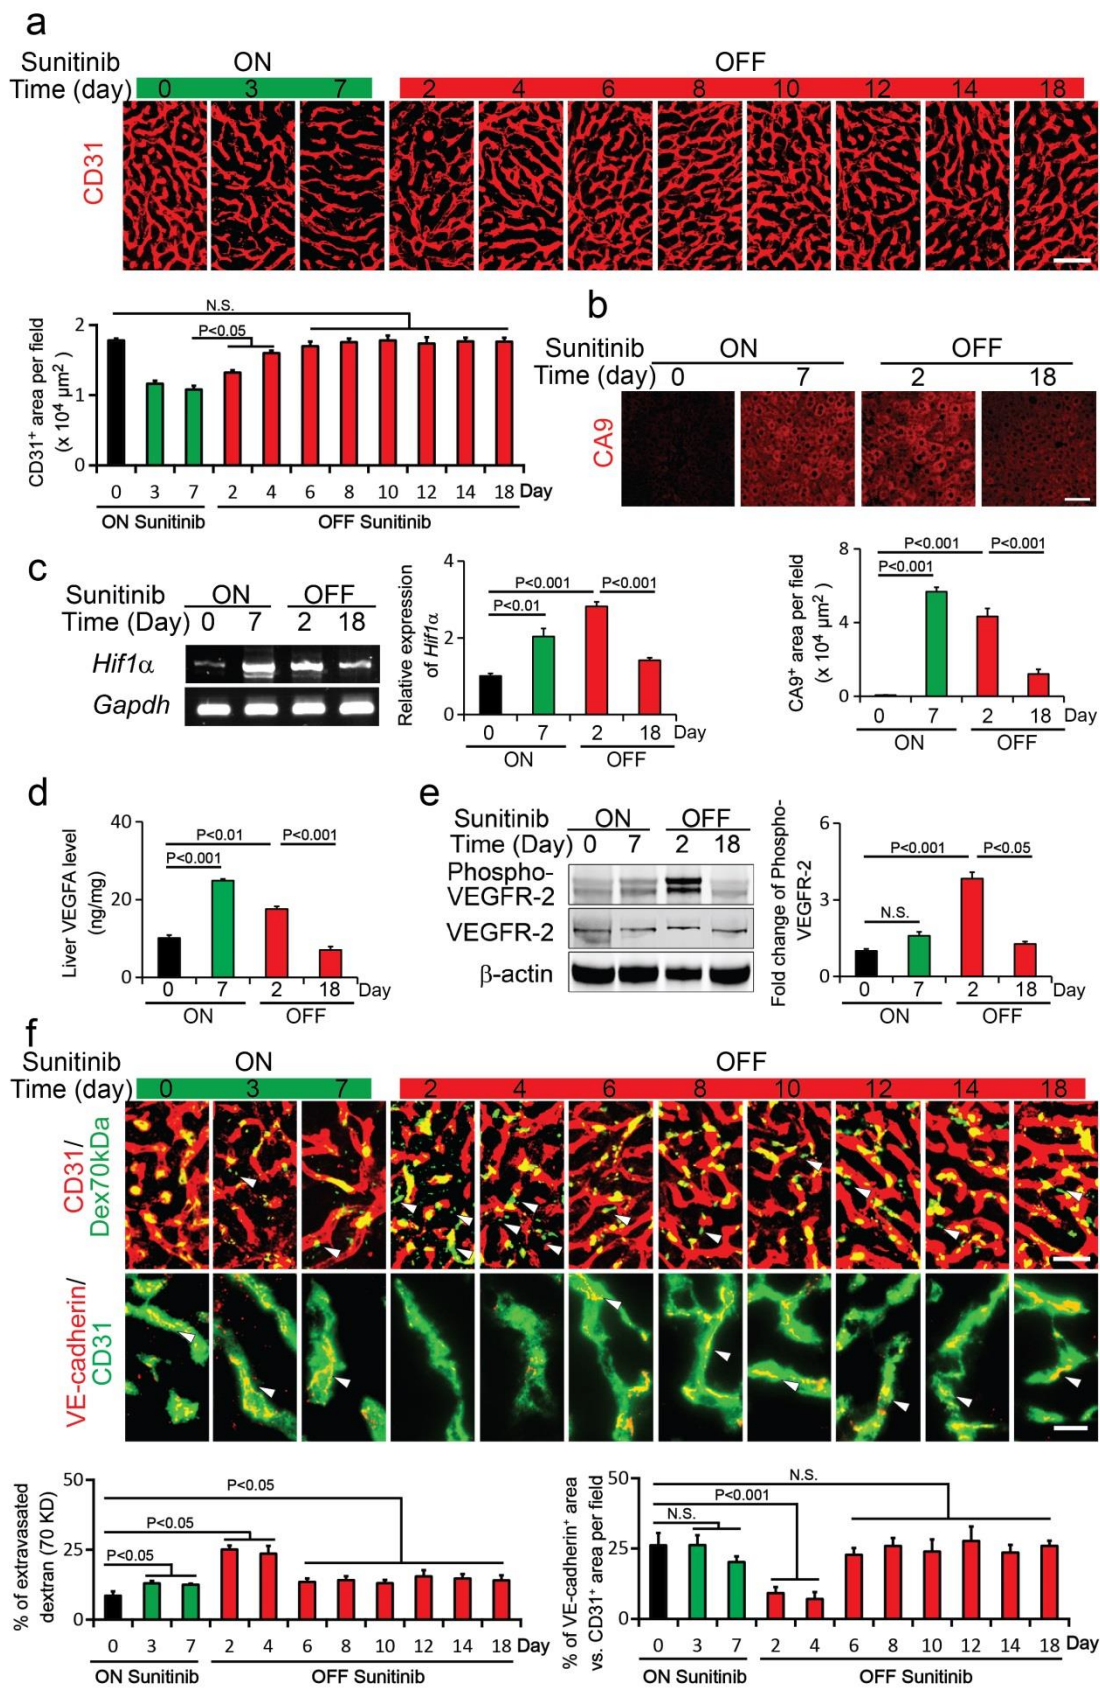

**Supplementary Figure 2. Revascularization of liver microvasculatures after withdrawal of systemic sunitinib treatment**

(a) Time-course analysis of CD31<sup>+</sup> microvessels in livers receiving prior to sunitinib, on-drug, and off-drug. Scale bar, 50  $\mu$ m. Data were quantified from 9 random fields per group. (b) Liver tissue hypoxia measured by CA9 expression in various groups. Scale bar, 100  $\mu$ m. Data were quantified from 9 random fields per group. (c) RT-PCR and qPCR quantification of *Hif1a* expression in various on- and off-drug groups (triplicates per group). (d) ELISA measurement of liver VEGF in different groups (triplicates per group). (e) Measurement and quantification of total and phosphorylated VEGFR2 protein levels in various groups (triplicates per group). (f) Measurements of extravasation of Fluorescein-labeled 70-kDa-dextran and expression levels of VE-cadherin in different groups. Arrows point to leaked dextran signals. Scale bar in upper panel, 25  $\mu$ m. Scale bar in lower panel, 10  $\mu$ m. Data were quantified from 9 random fields per group. ON = on-drug; OFF = off-drug. (mean  $\pm$  s.e.m., N.S., Not significant, Student's *t*-test).



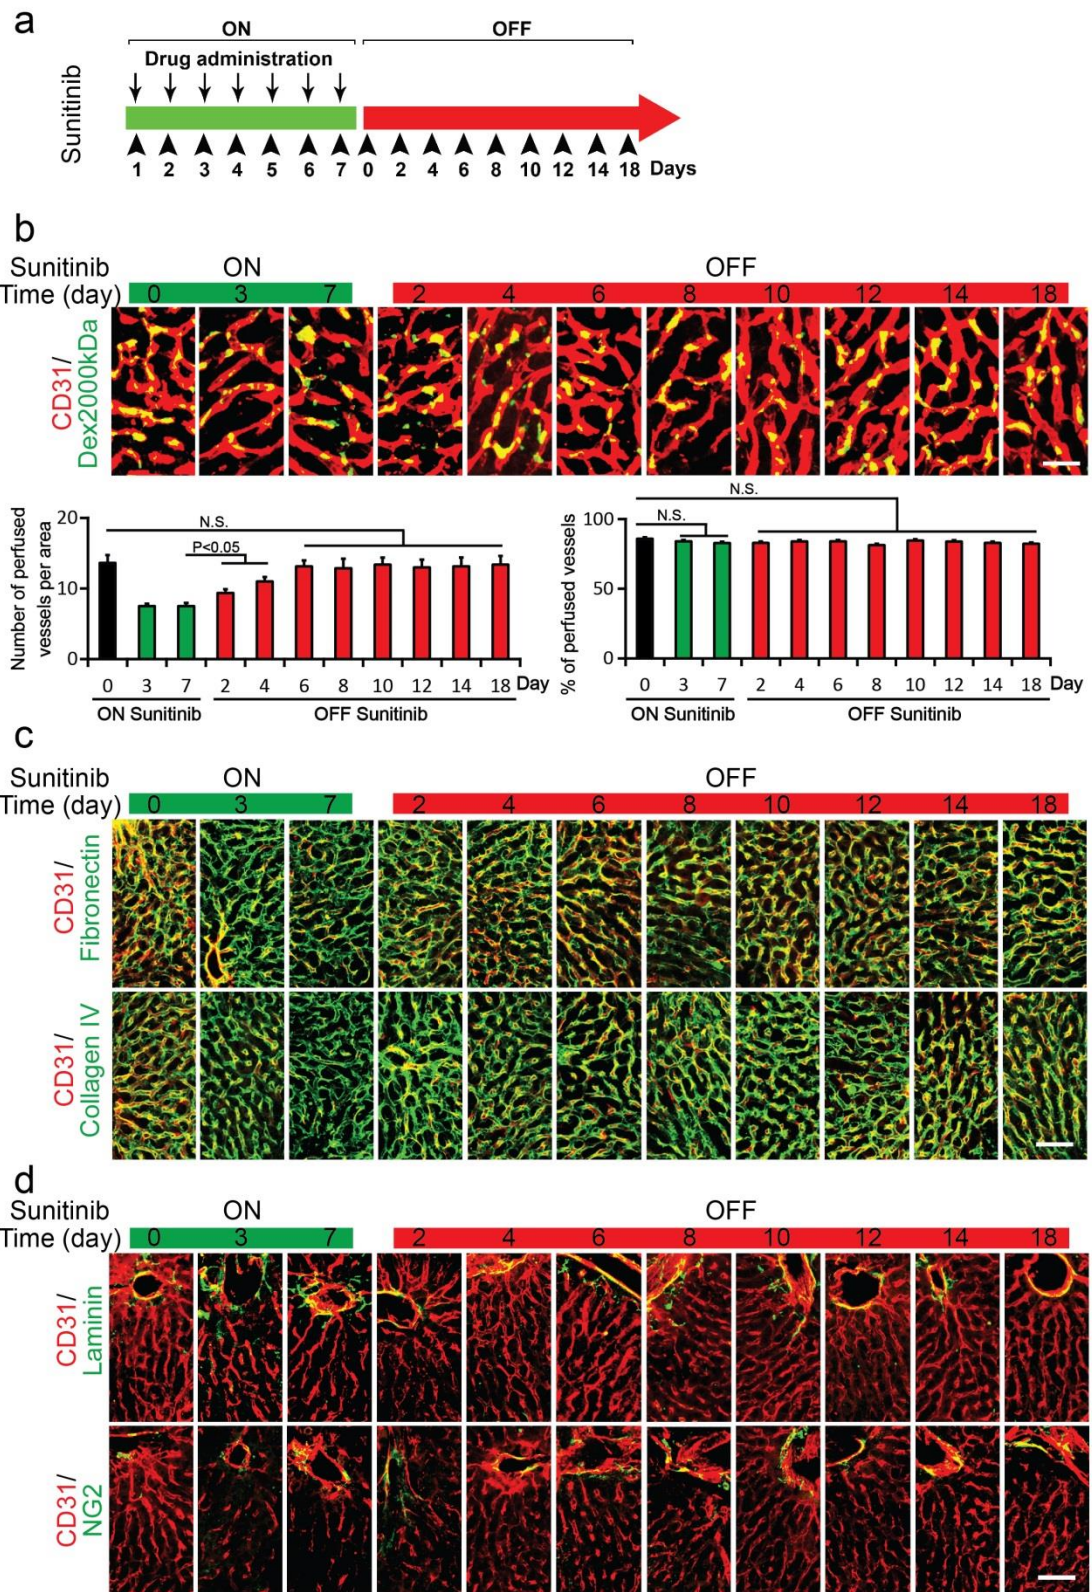

**Supplementary Figure 3: Vascular perfusion and expression of extracellular matrix proteins in on- and off-drug-treated livers**

(a) Schematic diagram of sunitinib treatment after withdrawal of drugs. (b) Vascular perfusion of Fluorescein-labeled 2000-kDa-dextran in liver microvasculatures of various groups. Arrows point to the dextran<sup>+</sup> signals. Scale bar, 25  $\mu\text{m}$ . Data were quantified from 9 random fields per group. (c) Immunohistochemical analysis of expression levels of fibronectin and collagen IV in various groups. Scale bar, 50  $\mu\text{m}$ . (d) Immunohistochemical analysis of expression levels of laminin and NG2 in various groups. Scale bar, 50  $\mu\text{m}$ . ON = on-drug; OFF = off-drug. (mean  $\pm$  s.e.m., N.S., Not significant, Student's *t*-test).

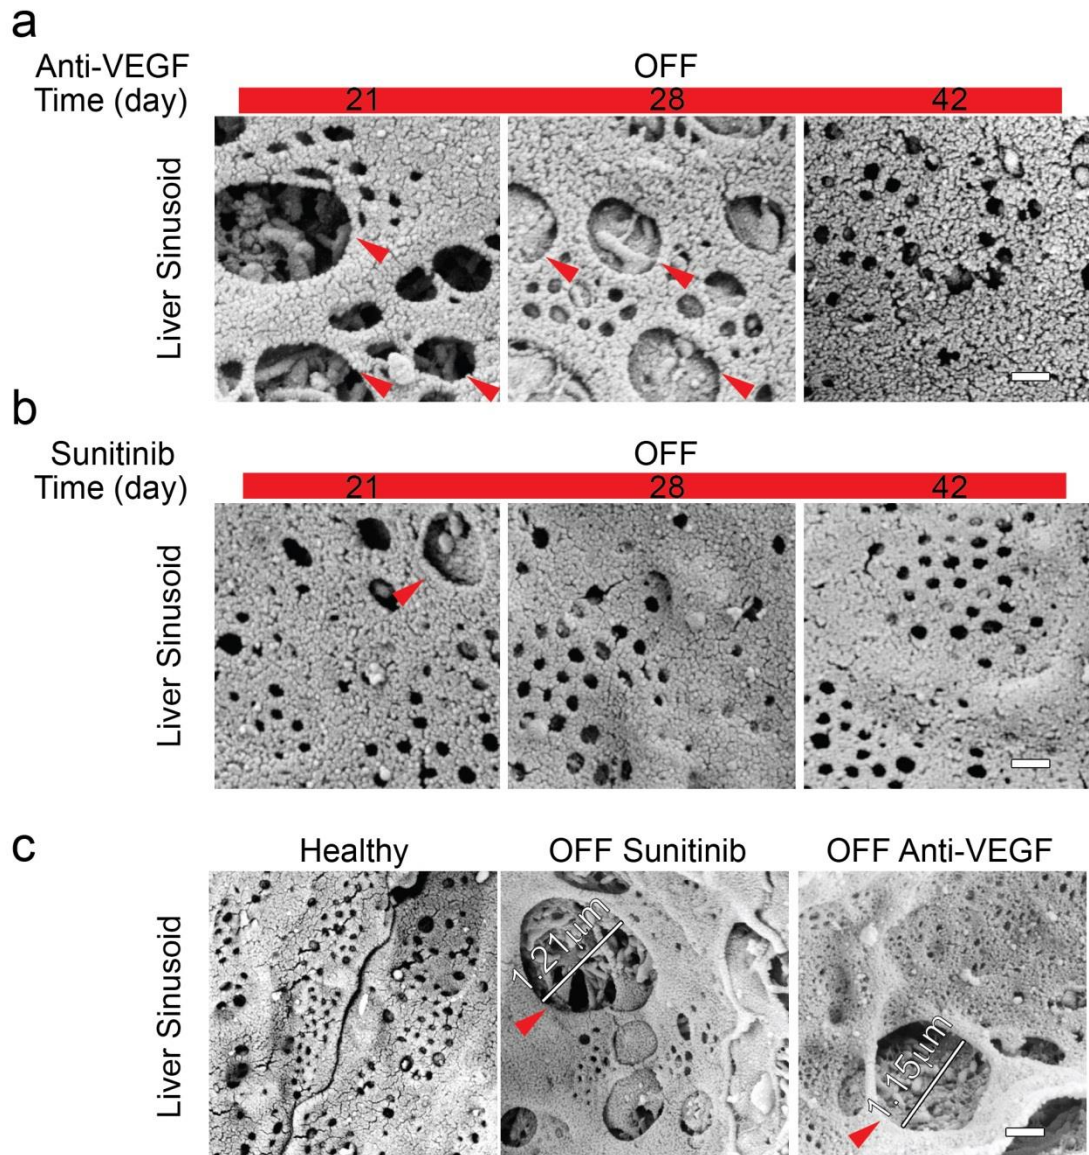

**Supplementary Figure 4: SEM time-course analysis of sinusoidal liver microvessels**

(a, b) Representative SEM micrographs of liver microvessel endothelium at different time points after cessation of VEGF blockade and sunitinib treatments. Red arrowheads point to enlarged open pores in the fenestrated endothelium. Scale bar, 200 nm. (c) Representative SEM micrographs of liver microvessel endothelium after cessation of VEGF blockade and sunitinib treatments. Red arrowheads point to biggest enlarged open pores in the fenestrated endothelium. Scale bar, 400 nm.



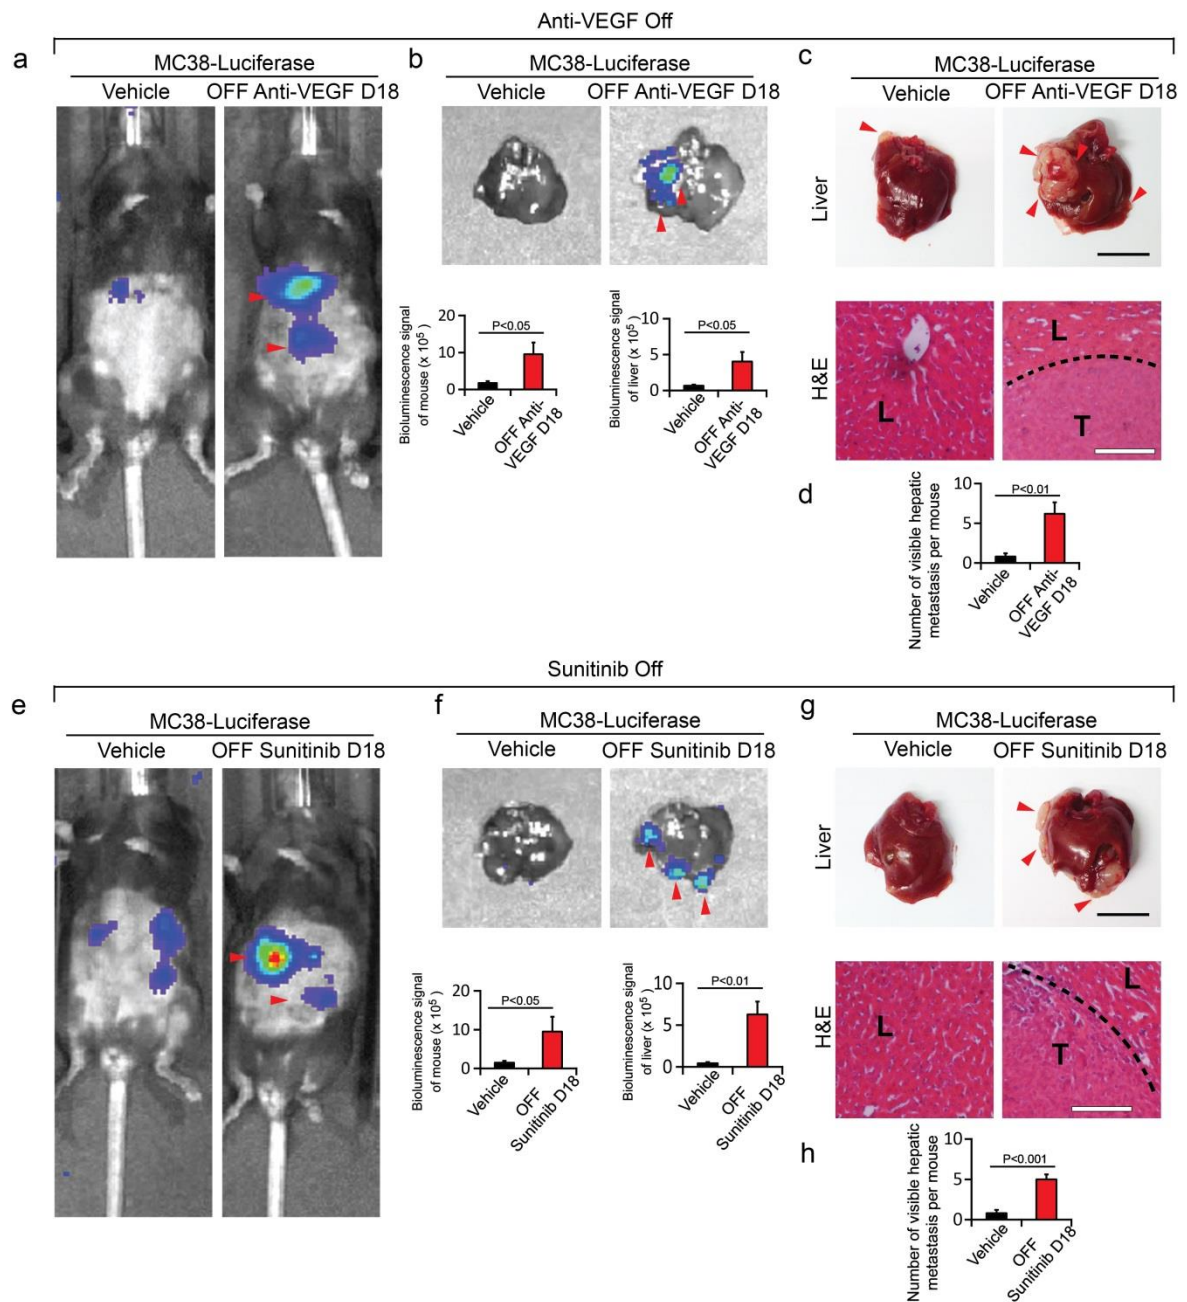

**Supplementary Figure 5. Off-drug-promoted CRC tumor cell extravasation and metastasis at later time points**

(a, e) Representative mouse pictures of various groups subjected to luminescent imaging analysis of luciferase activity in metastatic cancers. Red arrowheads point to luciferase positivity. Data were quantified from 6 mice per group. (b, f)

Representative liver micrographs subjected to luminescent luciferase activity analysis (n = 6 animals per group). Red arrowheads point to luciferase positivity. Quantifications of liver luciferase activity (n = 6 animals per group). **(c, g)** Representative liver pictures and H&E histological analysis of liver metastasis. Dashed lines mark the borders between tumor and liver tissues. T = tumor; L = liver. Scale bar in upper panel, 1 cm. Scale bar in lower panel, 100  $\mu$ m. **(d, h)** Quantification of visible surface liver metastatic nodules (n = 6 animals per group). ON = on-drug; OFF = off-drug. (mean  $\pm$  s.e.m., Student's *t*-test).

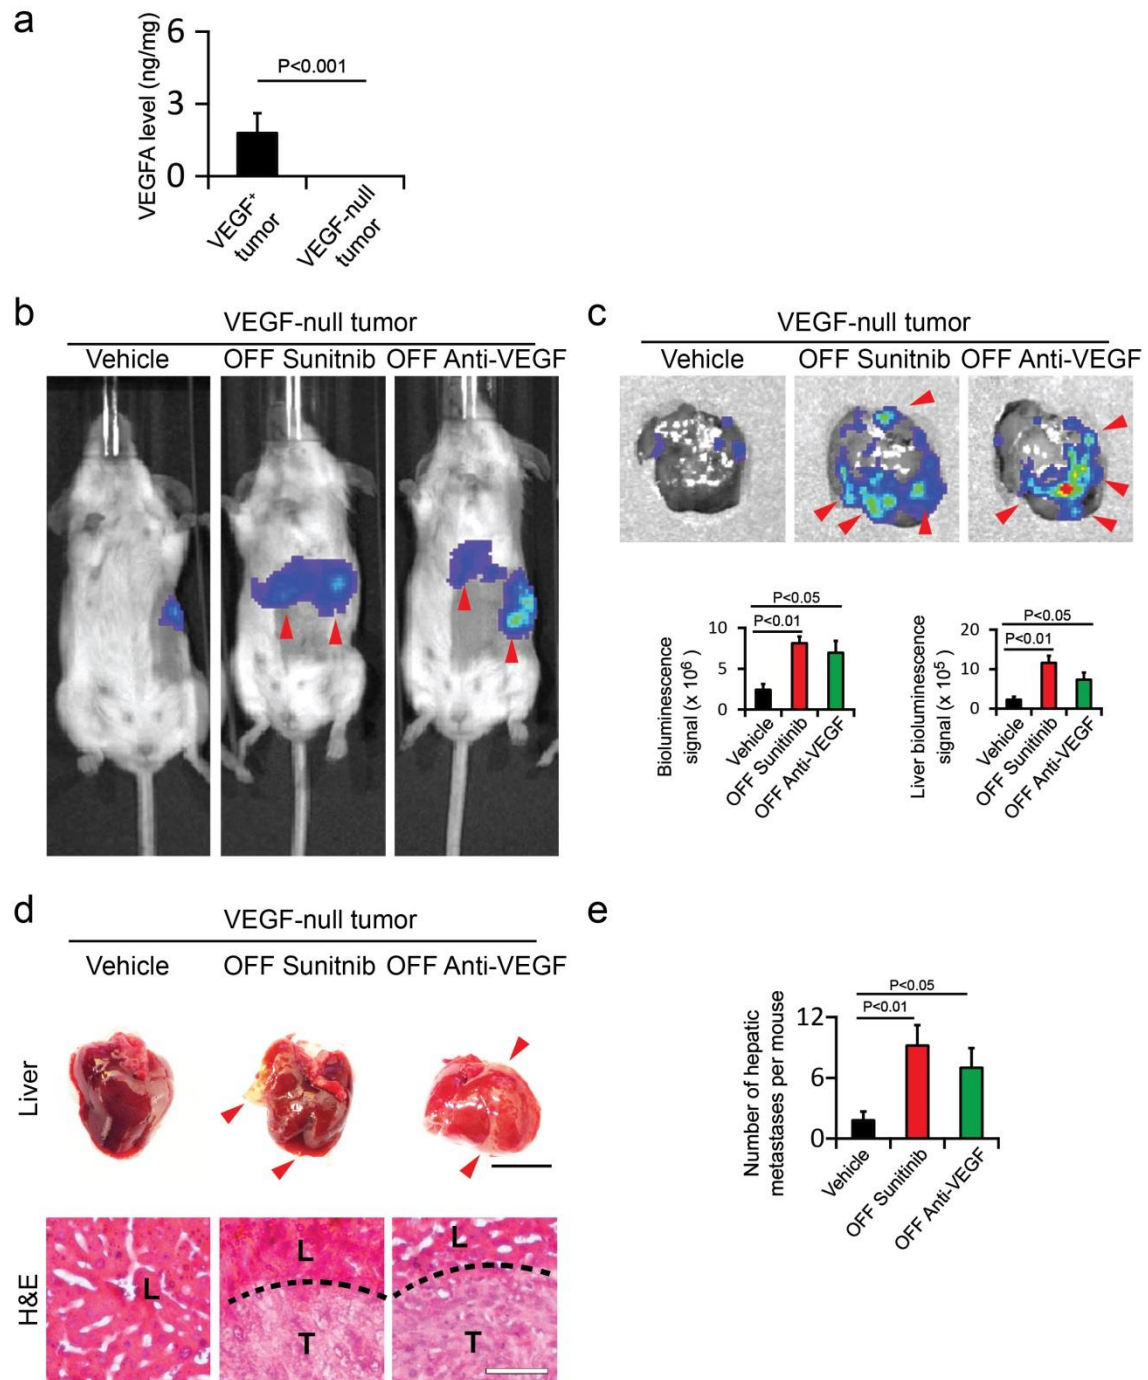

**Supplementary Figure 6. VEGF-null tumor cell extravasation and metastasis in livers**

(a) VEGF protein expression in VEGF<sup>+</sup> tumor and VEGF-null tumor cell lines (n = 3 samples per group). (b) Representative mouse pictures of various groups subjected to

luminescent imaging analysis of luciferase activity in metastatic cancers. Red arrowheads point to luciferase positivity. Data were quantified from 6 mice per group.

(c) Representative liver micrographs subjected to luminescent luciferase activity analysis (n = 6 animals per group). Red arrowheads point to luciferase positivity. Quantification of liver luciferase activity (n = 6 animals per group).

(d) Representative liver pictures and H&E histological analysis of liver metastasis. Dashed lines mark the borders between tumor and liver tissues. T = tumor; L = liver. Scale bar in upper panel, 1 cm. Scale bar in lower panel, 25  $\mu$ m.

(e) Quantifications of visible surface liver metastatic nodules (n = 6 animals per group). ON = on-drug; OFF = off-drug. (mean  $\pm$  s.e.m., Student's *t*-test).



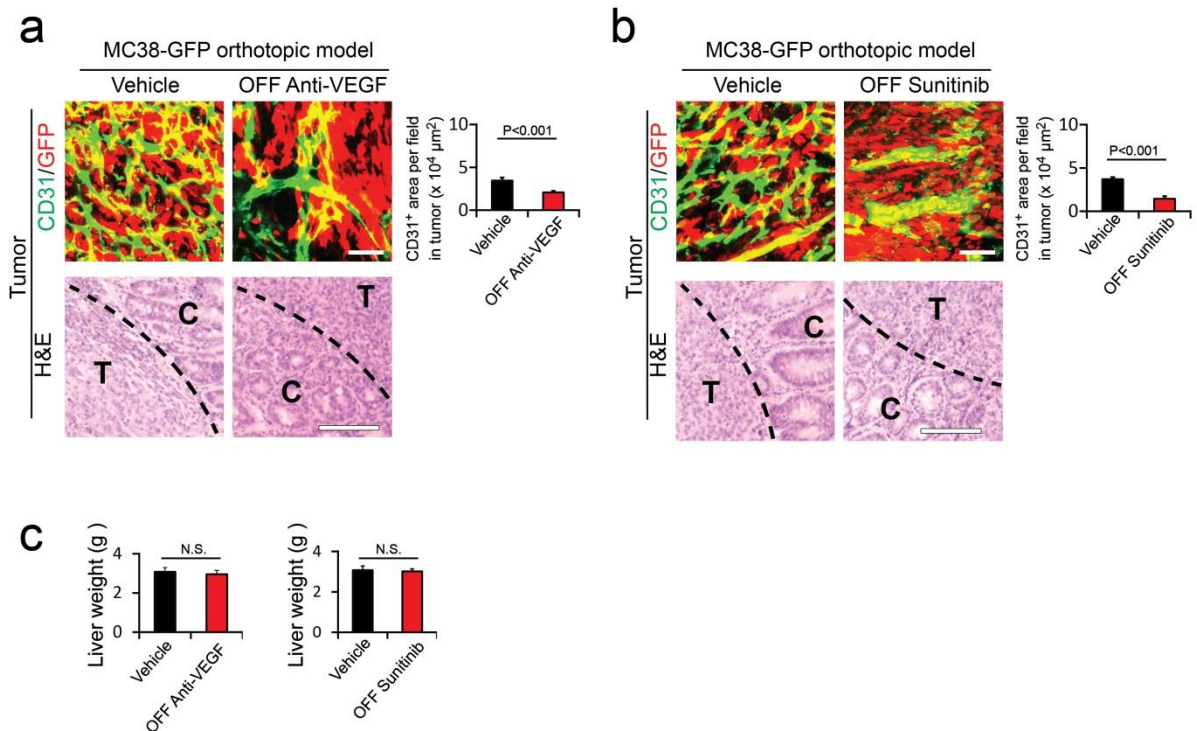

### Supplementary Figure 7. Primary tumor in orthotopic CRC and HCC tumor models

(a, b) Immunohistological analysis of CRC primary tumors. Green: CD31<sup>+</sup> signals. Red: GFP<sup>+</sup> signals. H&E histological analysis of primary CRC tumors. Dashed lines mark the borders between tumor and cecum tissues. T = tumor; C = cyst. Scale bar in upper panel, 50 μm. Scale bar in lower panel, 100 μm. Quantification of CD31<sup>+</sup> area.

(c) Quantification of liver weight after 4 weeks of HCC tumor implantation in an orthotopic HCC metastasis model. ON = on-drug; OFF = off-drug. (mean ± s.e.m., N.S., Not significant, Student's *t*-test).

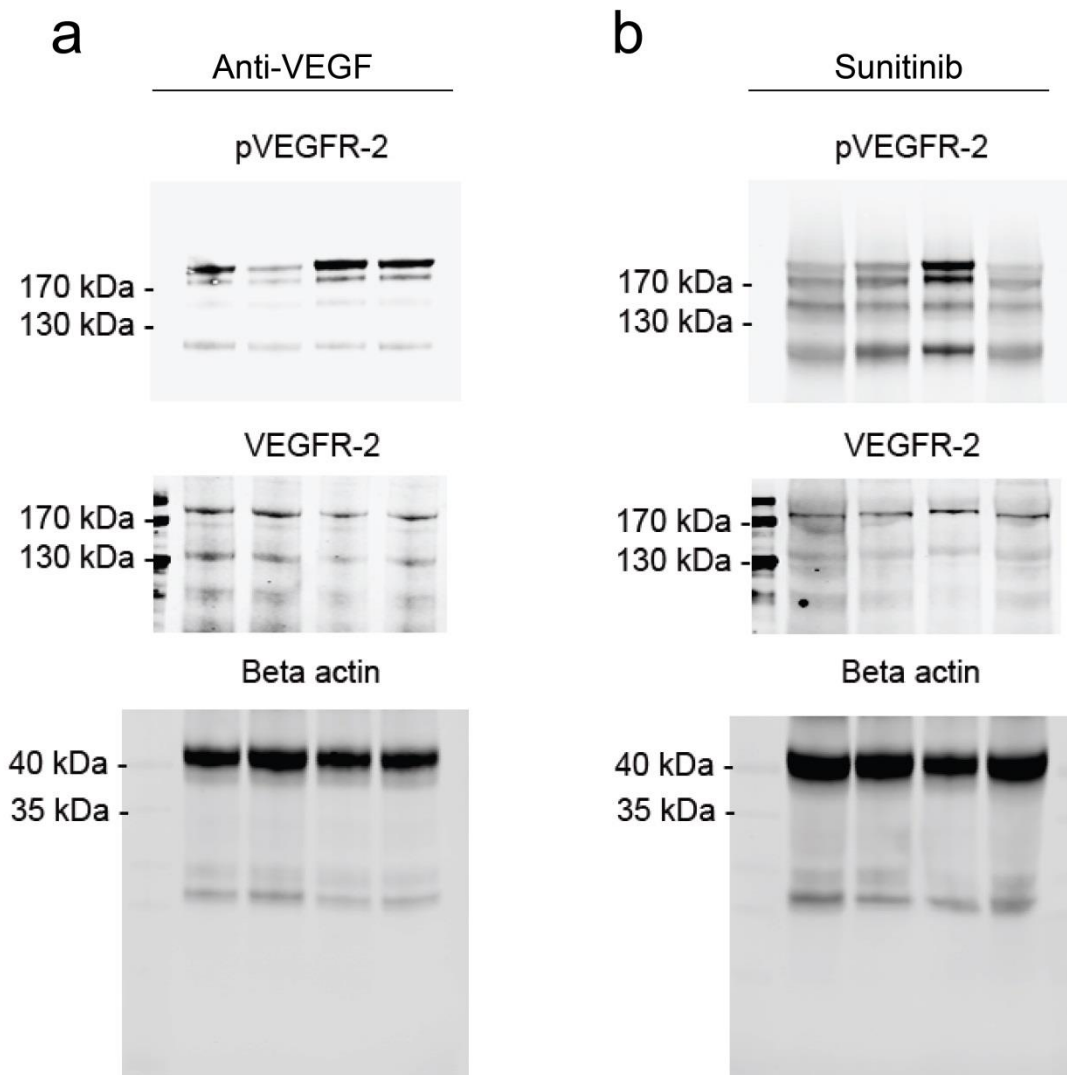

**Supplementary Figure 8. Original full-length western blots**

(a) Original western blots used for Fig. 1e. (b) Original western blots used for Supplementary Fig. 2e
